# Supplementary material
Source: MDPI journal article supplement (https://www.mdpi.com/2076-3417/10/9/3314)
Supplement: s1 [file s1]

# Supplementary Materials: Impact of Heart Rate Fragmentation on the Assessment of Heart Rate Variability

Junichiro Hayano, Masaya Kisohara, Norihiro Ueda and Emi Yuda

**Table S1.** Gender difference in heart rate variability and heart rate fragmentation metrics.

| Variable                  | Male        | Female      | P      |
|---------------------------|-------------|-------------|--------|
| HR, bpm                   | 72.8 ± 0.2  | 75 ± 0.2    | <.0001 |
| SDNN, ms                  | 146 ± 1     | 143 ± 1     | 0.0206 |
| rMSSD, ms                 | 39 ± 1      | 39 ± 1      | 0.7862 |
| ULF, ln(ms <sup>2</sup> ) | 9.58 ± 0.02 | 9.62 ± 0.02 | 0.0894 |
| VLF, ln(ms <sup>2</sup> ) | 7.55 ± 0.01 | 7.31 ± 0.01 | <.0001 |
| LF, ln(ms <sup>2</sup> )  | 6.38 ± 0.02 | 6.15 ± 0.02 | <.0001 |
| HF, ln(ms <sup>2</sup> )  | 5.69 ± 0.02 | 5.81 ± 0.02 | 0.0002 |
| VHF, ln(ms <sup>2</sup> ) | 4.82 ± 0.02 | 4.95 ± 0.02 | 0.0002 |
| LFHF                      | 2.43 ± 0.03 | 1.64 ± 0.03 | <.0001 |
| PIPh, %                   | 39.5 ± 0.2  | 40.6 ± 0.2  | <.0001 |
| PIPs, %                   | 25.9 ± 0.2  | 25.6 ± 0.2  | 0.2377 |
| Wh1, %                    | 16.7 ± 0.1  | 17 ± 0.1    | 0.086  |
| Wh2, %                    | 24.2 ± 0.2  | 25.3 ± 0.2  | <.0001 |
| Wh3, %                    | 6.76 ± 0.09 | 6.79 ± 0.09 | 0.8209 |
| Ws1, %                    | 5.84 ± 0.05 | 5.15 ± 0.05 | <.0001 |
| Ws2, %                    | 10.8 ± 0.1  | 10.3 ± 0.1  | <.0001 |
| Ws3, %                    | 3.95 ± 0.04 | 3.83 ± 0.04 | 0.0326 |
| W0, %                     | 4.19 ± 0.04 | 3.22 ± 0.04 | <.0001 |
| Wm2, %                    | 11.2 ± 0.1  | 11.7 ± 0.1  | <.0001 |
| Wm3, %                    | 16.3 ± 0.1  | 16.7 ± 0.1  | 0.0002 |

Data are least-square means ± standard error of the mean adjusted for the effect of age. HR = 24-h mean heart rate, SDNN = standard deviation of 24-h normal-to-normal R-R (NN) intervals, rMSSD = root mean square of successive difference in NN intervals, ULF = ultra-low frequency (<0.0033 Hz), VLF = very-low frequency (0.0033–0.04 Hz), LF = low frequency (0.04–0.15 Hz), HF = high frequency (0.15–0.4 Hz), VHF = very high frequency (0.4–1.0 Hz), LF/HF = LF-to-LF ratio, PIPh = percentage of hard inflection point, PIPs = percentage of soft inflection point, and variables consisting of letter “W” with the type (h = hard, s = soft, and m = mixed) and number are the word categories of symbolic dynamics for four consecutive NN interval differences (Table 1).
